# Supplementary material for: Maternal Urinary Bisphenol A during Pregnancy and Maternal and Neonatal Thyroid Function in the CHAMACOS Study
Source: PubMed Central journal article supplement (PMC3553432; doi:10.1289/ehp.1205092), 2012-10-04
Supplement: ehp.1205092.s001.pdf [file ehp.1205092.s001.pdf]

## **SUPPLEMENTAL MATERIAL**

### **Maternal Urinary Bisphenol A during Pregnancy and Maternal and Neonatal Thyroid Function in the CHAMACOS Study**

Jonathan Chevrier<sup>1</sup>, Robert B. Gunier<sup>1</sup>, Asa Bradman<sup>1</sup>, Nina T. Holland<sup>1</sup>, Antonia M. Calafat<sup>2</sup>, Brenda Eskenazi<sup>1</sup> and Kim G. Harley<sup>1</sup>

<sup>1</sup>Center for Children's Environmental Health Research, School of Public Health, University of California, Berkeley, Berkeley, California, USA.

<sup>2</sup>Division for Laboratory Sciences, National Center for Environmental Health, Centers for Disease Control and Prevention, Atlanta, Georgia, USA.

**Supplemental Material, Table S1.** Urinary bisphenol A concentrations ( $\mu\text{g/g}$  creatinine) during pregnancy in CHAMACOS study participants in samples included in analyses of maternal (n=335) and neonatal (n=364) serum thyroid hormone levels.

| Timing of Measurement              | N   | Percentiles      |                  |                  | Range                  | Geometric Mean (GSD <sup>a</sup> ) | Detection Frequency |
|------------------------------------|-----|------------------|------------------|------------------|------------------------|------------------------------------|---------------------|
|                                    |     | 25 <sup>th</sup> | 50 <sup>th</sup> | 75 <sup>th</sup> |                        |                                    |                     |
| Maternal TH <sup>b</sup> analyses  |     |                  |                  |                  |                        |                                    |                     |
| Closest measurement                | 335 | 0.7              | 1.1              | 1.9              | <LOD <sup>c</sup> – 37 | 1.2 (2.3)                          | 82%                 |
| Farthest measurement               | 335 | 0.7              | 1.1              | 1.8              | <LOD – 27              | 1.1 (2.3)                          | 81%                 |
| Pregnancy average                  | 335 | 0.8              | 1.2              | 1.9              | <LOD – 19              | 1.3 (2.0)                          | 82%                 |
| Neonatal TSH <sup>d</sup> analyses |     |                  |                  |                  |                        |                                    |                     |
| Closest measurement                | 364 | 0.7              | 1.2              | 1.9              | <LOD – 48              | 1.2 (2.3)                          | 82%                 |
| Farthest measurement               | 364 | 0.7              | 1.1              | 1.8              | <LOD – 27              | 1.1 (2.3)                          | 82%                 |
| Pregnancy average                  | 364 | 0.8              | 1.2              | 1.9              | <LOD – 24              | 1.3 (2.0)                          | 82%                 |

<sup>a</sup> GSD = geometric standard deviation.

<sup>b</sup> Thyroid hormone.

<sup>c</sup> Limit of detection (LOD) = 0.4 $\mu\text{g/L}$ .

<sup>d</sup> Thyroid-stimulating hormone
